# Supplementary material
Source: Research Square preprint supplement (doi:10.21203/rs.3.rs-9114402/v1)
Supplement: Supplementary file 1 [file 65f71eedbd04f4f304395c9e.docx]

Table S1. Sampling locations in this study

| Location | Abbreviation | Latitude | Longitude |
| --- | --- | --- | --- |
| Kitami | KIT | 43°86'N | 143°75'E |
| Kenbuchi | KB | 44°09'N | 142°39’E |
| Pippu | PP | 43°89’N | 142°46’E |
| Sapporo-1 | SP | 42°97’N | 142°22’E |
| Sapporo-2 | SP-G | 42°94’N | 141°34’E |
| Sapporo-3 | KG | 42°98’N | 141°21’E |
| Bibai | BB | 43°29’N | 141°85’E |
| Shibetsu | SB | 44°17’N | 142°87’E |
| Nayoro | NY | 44°32’N | 142°50’E |
| Bifuka | BF | 44°56’N | 142°32’E |
| Asahikawa | AS | 43°81’N | 142°49’E |
| Kamui | KM | 43°74’N | 142°20’E |
| Furano | FR | 43°32’N | 142°35’E |
| Biei-1 | BE-t | 43°53’N | 142°49’E |
| Biei-2 | BE-b | 43°59’N | 142°46’E |
| Yubari-1 | YU | 43°05’N | 141°97’E |
| Yubari-2 | YU-h | 42°93’N | 142°09’E |
| Mukawa | HB | 42°87’N | 142°13’E |
| Shimukappu | SM | 42°98’N | 142°40’E |
| Shimizu | OB | 43°46’N | 142°89’E |
| Memuro | MM | 42°83’N | 142°98’E |
| Nakasatsunai | NK | 42°69’N | 143°13’E |
| Nobechi | NOB | 40°86’N | 141°13’E |
| Nasushiobara | NAS | 36°93’N | 139°95’E |
| Fukushima | FUK | 37°72’N | 140°36’E |
| Fukuoka | KS | 33°55’N | 130°36’E |

Table S2. Primer sequences used in this study

| Target | Primers | Sequence (5’→3’) | Reference Papers |
| --- | --- | --- | --- |
| *Wolbachia wsp* | wsp81F  wsp691R | TGGTCCAATAAGTGATGAAGAAAC  AAAAATTAAACGCTACTCCA | Zhou et al., 1998 |
| *Spiroplasma* 16srRNA  (for detection) | LdSpiro F1  LdSpiro R1 | CCAGTGGCGAAAGCAGCTAAC  CCTTGCGGTTAGGACACCGAC | This paper |
| *Spiroplasma* 16SrRNA  (for sequence) | 63F  TKSSsp  SP-ITS-N | GCCTAATACATGCAAGTCGAAC  TAGCCGTGGCTTTCTGGTAA  GGTAGTCACGTCCTTCATCG | Mateos et al., (2006)  Fukatsu et al., (2000)  Hurst et al., (1999) |
| *Spiroplasma RpoB* | RpoBF3  RpoBR2 | GGNTTTATTGAAACACCATAYCGTC  GCATGTAATTTATCATCAACCATGTGTG | Tabata et al., (2011) |
| *Spiroplasma qRpoB* | HmSpiro_RpoB388qF  HmSpiro_RpoB483qR | GCATACTCTCAACACCCGTACCA  TGCTAACCGTGCTTTAATGGG | Arai et al., (2022) |
| *Lymantria dispar cad* | cadF  cad2R | TGTTTCTACTCCTTCGTTTTAGGGG  CCACAATCTATGGCCATAATTG | This paper |
| *Lymantria* mtDNA | S2994  A3772 | GAACATTCITATAATGAACTYCCT  GAGACCATTACTTGCTTTCAGTCATCT | Bogdanowicz et al., (2000) |
| *LdMasc* upstream sequence | EzoMai F2  EzoMai R2 | CGGAATGGACCGCGTGTGTGCTTAT  GAATGACATAGGGTCATAGTGACCG | This paper |

Table S3. PCR conditions used in the study

|  | Pre-denaturation | Denaturation | Annealing | Elongation | Cycles | Final extension |
| --- | --- | --- | --- | --- | --- | --- |
| *Wolbachia wsp* | 94 ℃ 3min | 94 ℃ 1 min | 60 ℃ 1 min | 72 ℃ 1 min | 35 | 72 ℃ 7 min |
| *Spiroplasma* 16SrRNA | 94 ℃ 3 min | 98 ℃ 10 s | 57 ℃ 30 s | 72 ℃ 1 min | 35 | 72 ℃ 2 min |
| *RpoB* | - | 94 ℃ 30 s | 55 ℃ 30 s | 72 ℃ 30 s | 35 | 72 ℃ 7 min |
| mtDNA | 94 ℃ 2 min | 94 ℃ 1 min | 43 ℃ 1 min | 72 ℃ 2 min | 35 | 72 ℃ 7 min |

Table S4. qPCR and *LdMasc* upstream sequence PCR conditions used in the study

|  | Pre-denaturation | Denaturation | | Annealing and Elongation | Cycles |
| --- | --- | --- | --- | --- | --- |
| qPCR | 95 ℃ 30 s | 95 ℃ 5s | | 60 ℃ 30s | 40 |
| *LdMasc* upstream sequence | 94 ℃ 3 min | | 98 ℃ 10 s | 68 ℃ 3 min | 35 |
